# Supplementary material for: Cohabitant: The Design, Implementation, and Evaluation of a Virtual Reality Application for Interfaith Learning and Empathy Building
Source: Atypon-hosted journal article supplement (doi:10.1145/3613904.3642821), 2024-05-11
Supplement: pn5223-supplemental-material-2.pdf [file pn5223-supplemental-material-2.pdf]

**Cohabitant: The Design, Implementation, and Evaluation of a Virtual Reality Application  
for Interfaith Learning and Empathy Building**

**Interpersonal Reactivity Index Items**

| <b>Real</b>                                                                                           | <b>Decoy Pre-Test</b>                                                                          | <b>Decoy Post-Test</b>                                                            |
|-------------------------------------------------------------------------------------------------------|------------------------------------------------------------------------------------------------|-----------------------------------------------------------------------------------|
| I often have tender, concerned feelings for people less fortunate than me.                            | I like daydreaming and traveling to different worlds inside my head.                           | I always find that I tend to do the right thing at the right time.                |
| I sometimes find it difficult to see things from the "other guy's" point of view.                     | When something bad happens to a family member, I am always there to support them.              | I think it's important to be there for people, but not at the expense of myself.  |
| Sometimes I don't feel very sorry for other people when they are having problems.                     | I think the true test of friendship is if you can stay friends through thick and thin.         | I think being selfish is sometimes okay.                                          |
| I try to look at everybody's side of a disagreement before I make a decision.                         | It's important for me to maintain a balanced lifestyle: mind, body, and spirit.                | As long as I am happy, being particularly successful is not very important to me. |
| When I see someone being taken advantage of, I feel kind of protective towards them.                  | I think everyone should follow their dreams.                                                   | When people tell me to follow my dreams, I think they're naive.                   |
| I sometimes try to understand my friends better by imagining how things look from their perspective.  | When I feel down, I usually listen to music to lift my spirits.                                | Music is a huge part of my life.                                                  |
| Other people's misfortunes do not usually disturb me a great deal.                                    | In my old age, it's important for me to feel like I've done something meaningful with my life. | I love volunteering and helping those less fortunate than I am.                   |
| If I'm sure I'm right about something, I don't waste much time listening to other people's arguments. | I like to work on projects that improve the world.                                             | I find being around other people all the time exhausting.                         |
| When I see someone being                                                                              | I enjoy my own time.                                                                           | I am a dependable person.                                                         |

**Cohabitant: The Design, Implementation, and Evaluation of a Virtual Reality Application  
for Interfaith Learning and Empathy Building**

**Interpersonal Reactivity Index Items**

| <b>Real</b>                                                                              | <b>Decoy Pre-Test</b>                                            | <b>Decoy Post-Test</b>                                                                                        |
|------------------------------------------------------------------------------------------|------------------------------------------------------------------|---------------------------------------------------------------------------------------------------------------|
| treated unfairly, I sometimes don't feel very much pity for them.                        |                                                                  |                                                                                                               |
| I am often quite touched by things that I see happen.                                    | I consider myself a good shoulder to cry on.                     | I hate asking others for help.                                                                                |
| I believe that there are two sides to every question and try to look at them both.       | When I need a favor, I find it difficult to ask others for help. | I think everybody should do their best to not waste their life on meaningless things.                         |
| I would describe myself as a pretty soft-hearted person.                                 | I don't see any value in wasting time.                           | I would rather have a high-paying job that makes me unhappy rather than a low-paying job that makes me happy. |
| When I'm upset at someone, I usually try to "put myself in his shoes" for a while.       | I think it's more important to be happy than wealthy.            | I think every single person out there is in control of their destiny.                                         |
| Before criticizing somebody, I try to imagine how I would feel if I were in their place. | I believe a lot can be achieved simply by positive thinking.     | If somebody is unhappy, I believe that this is mostly their fault.                                            |
